# Supplementary material for: Prognostic value of cardiac biomarkers in COVID-19 infection
Source: Sci Rep. 2021 Mar 2;11:4930. doi: 10.1038/s41598-021-84643-6 (PMC7925599; doi:10.1038/s41598-021-84643-6)
Supplement: Supplementary file 1 — Supplementary Figures. [file 41598_2021_84643_MOESM1_ESM.pdf]

## **Prognostic value of Cardiac Biomarkers in COVID-19 Infection.**

Aakash Sheth\*, MD, Malak Modi\*, MD, Desiree' Dawson\*, MD, Paari Dominic, MD

\*Equal contributors

### **Supplemental Figure Legends:**

Supplemental Figure 1: Forest plot of WMD in CK between alive and/or not critically ill patients and dead and/or critically ill patients with COVID-19.

Supplemental Figure 2: Relationship between HTN and WMD in troponin levels in individual studies in a multivariate meta-regression model.

Supplemental Figure 3: Relationship between CVD and WMD in troponin levels in individual studies in a multivariate meta-regression model.

Supplemental Figure 4: Forest plot of WMD in D-dimer between alive and/or not critically ill patients and dead and/or critically ill patients with COVID-19.

Supplemental Figure 5: Forest plot of WMD in LDH between alive and/or not critically ill patients and dead and/or critically ill patients with COVID-19.

Supplemental Figure 6: Forest plot of WMD in IL-6 between alive and/or not critically ill patients and dead and/or critically ill patients with COVID-19.

Supplemental Figure 7: Forest plot of WMD in CRP between alive and/or not critically ill patients and dead and/or critically ill patients with COVID-19.

Supplemental Figure 8: Funnel plot for publication bias for studies reporting Troponin.

Supplemental Figure 9: Funnel plot for publication bias for studies reporting CK.

Supplemental Figure 10: Funnel plot for publication bias for studies reporting BNP.

Supplemental Figure 11: Funnel plot for publication bias for studies reporting D-dimer.

Supplemental Figure 12: Funnel plot for publication bias for studies reporting LDH.

Supplemental Figure 13: Funnel plot for publication bias for studies reporting IL-6.

Supplemental Figure 14: Funnel plot for publication bias for studies reporting CRP.

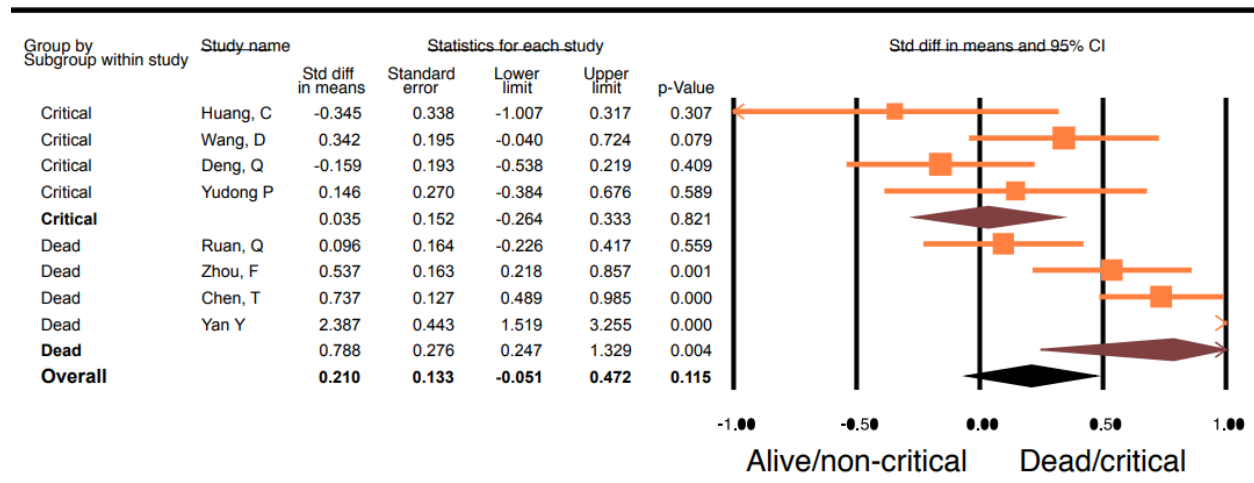

**Supplemental Figure 1.** Forest plot of WMD in CK between alive and/or not critically ill patients and dead and/or critically ill patients with COVID-19.

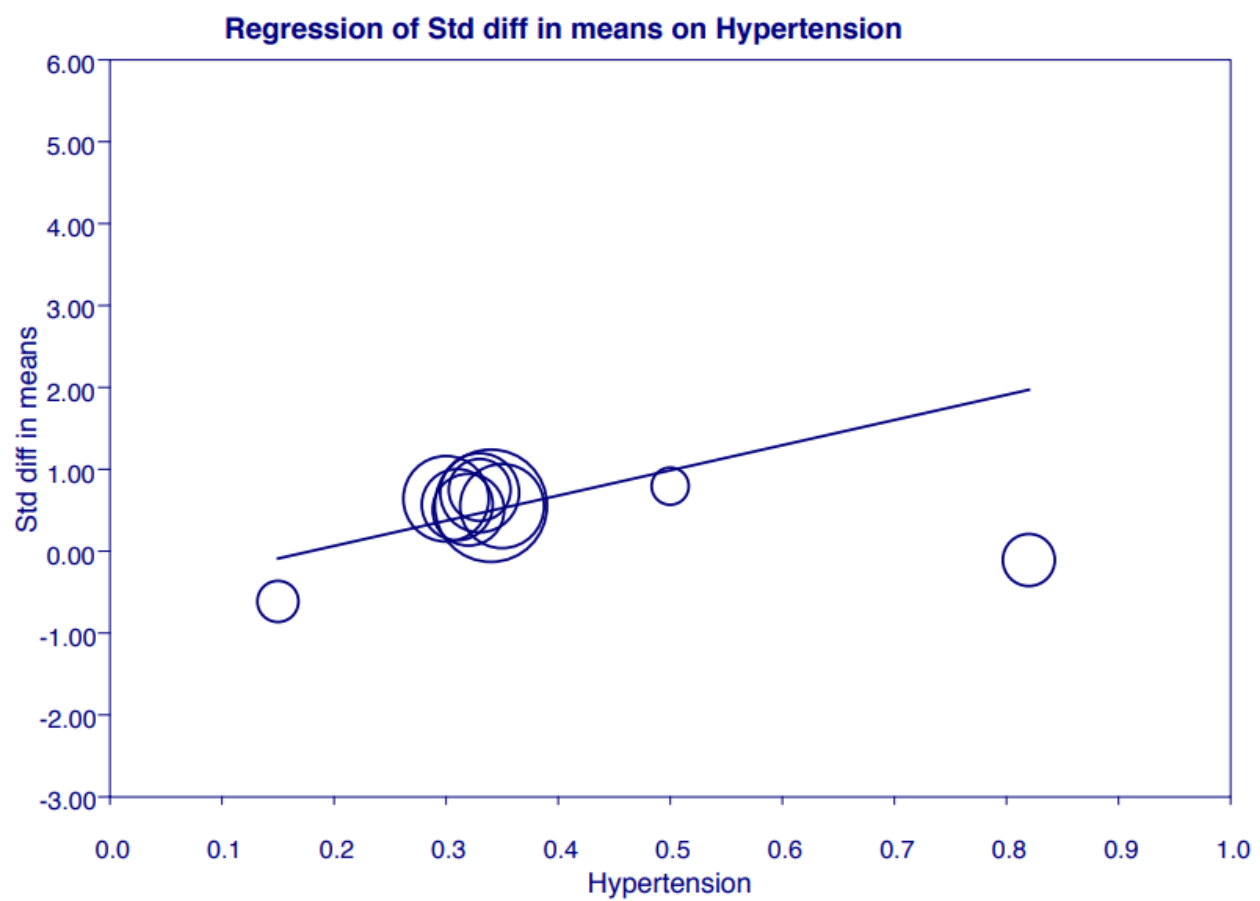

**Supplemental Figure 2.** Relationship between HTN and WMD in troponin levels in individual studies in a multivariate meta-regression model.

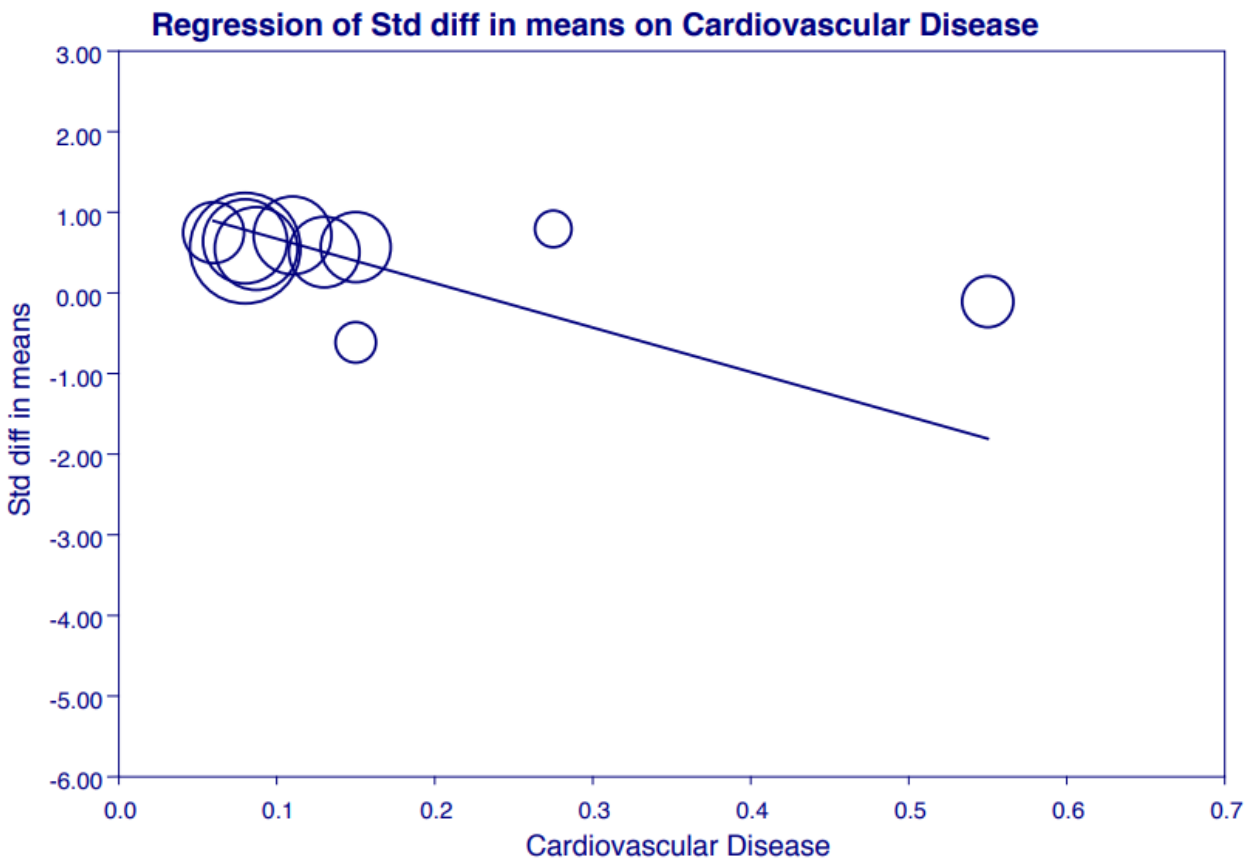

**Supplemental Figure 3.** Relationship between CVD and WMD in troponin levels in individual studies in a multivariate meta-regression model.

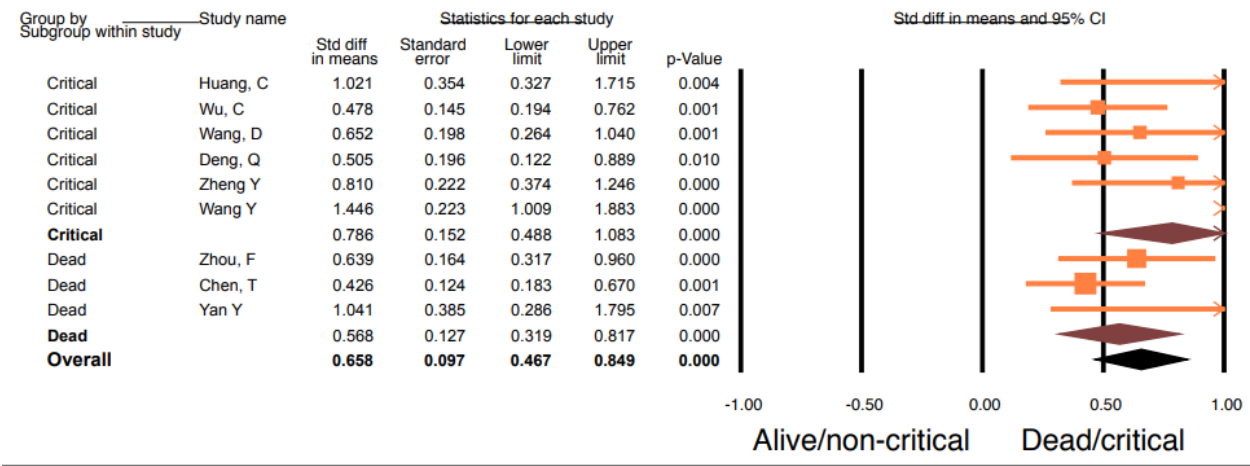

**Supplemental Figure 4.** Forest plot of WMD in D-dimer between alive and/or not critically ill patients and dead and/or critically ill patients with COVID-19.

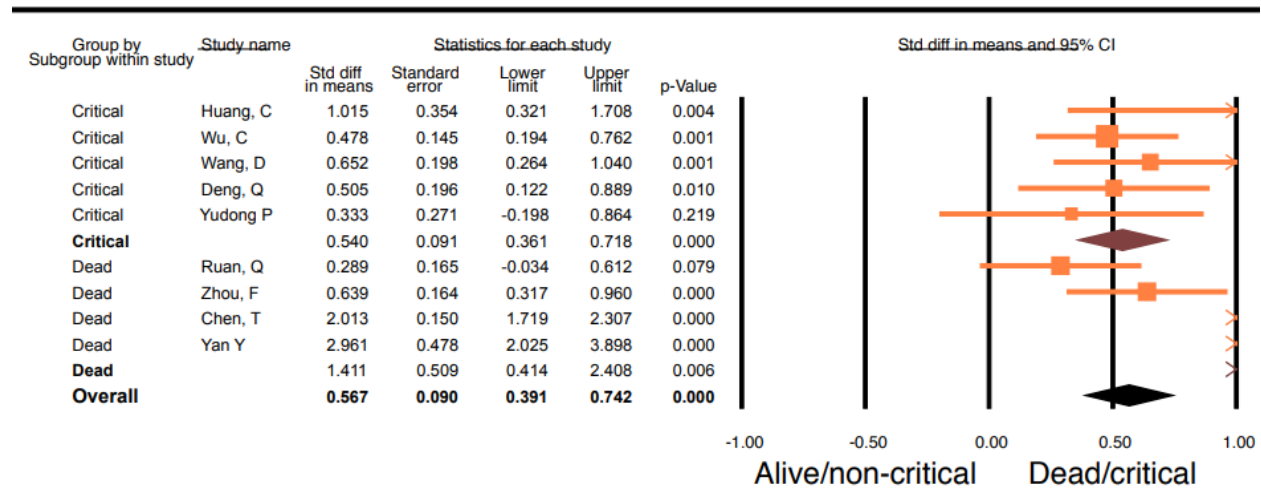

**Supplemental Figure 5.** Forest plot of WMD in LDH between alive and/or not critically ill patients and dead and/or critically ill patients with COVID-19.

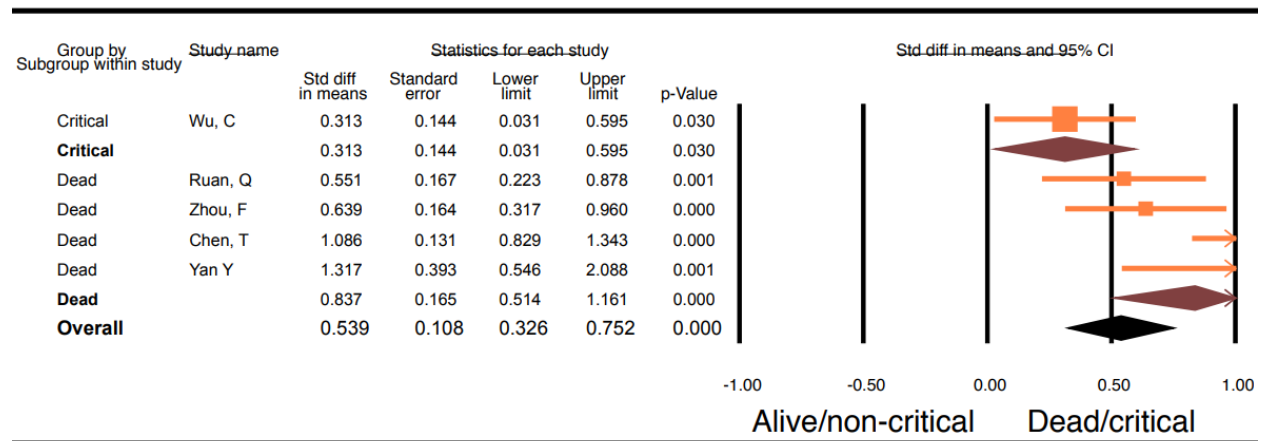

**Supplemental Figure 6.** Forest plot of WMD in IL-6 between alive and/or not critically ill patients and dead and/or critically ill patients with COVID-19.

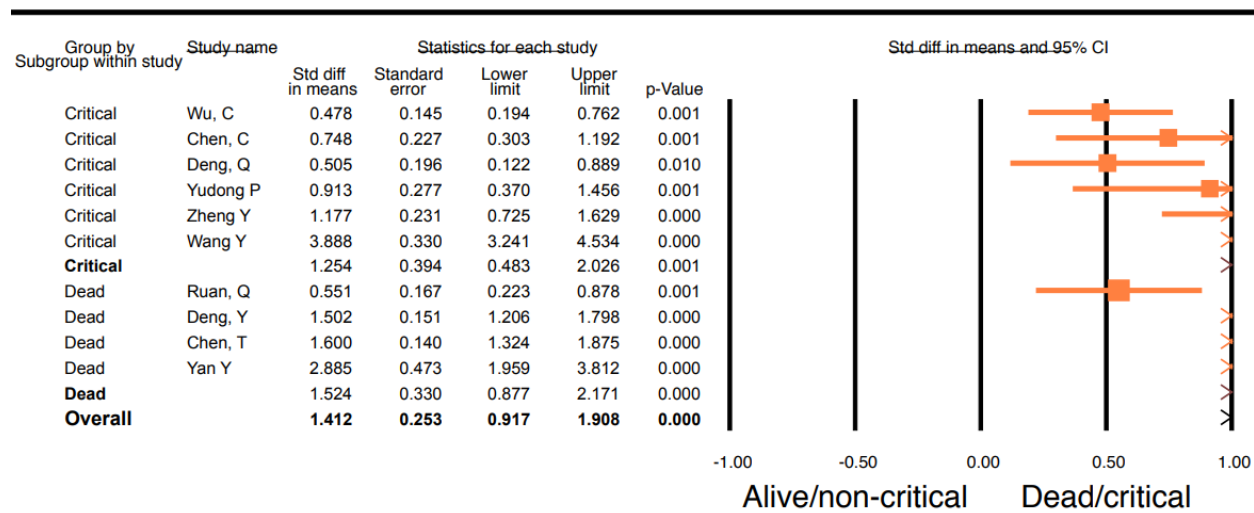

**Supplemental Figure 7.** Forest plot of WMD in CRP between alive and/or not critically ill patients and dead and/or critically ill patients with COVID-19.

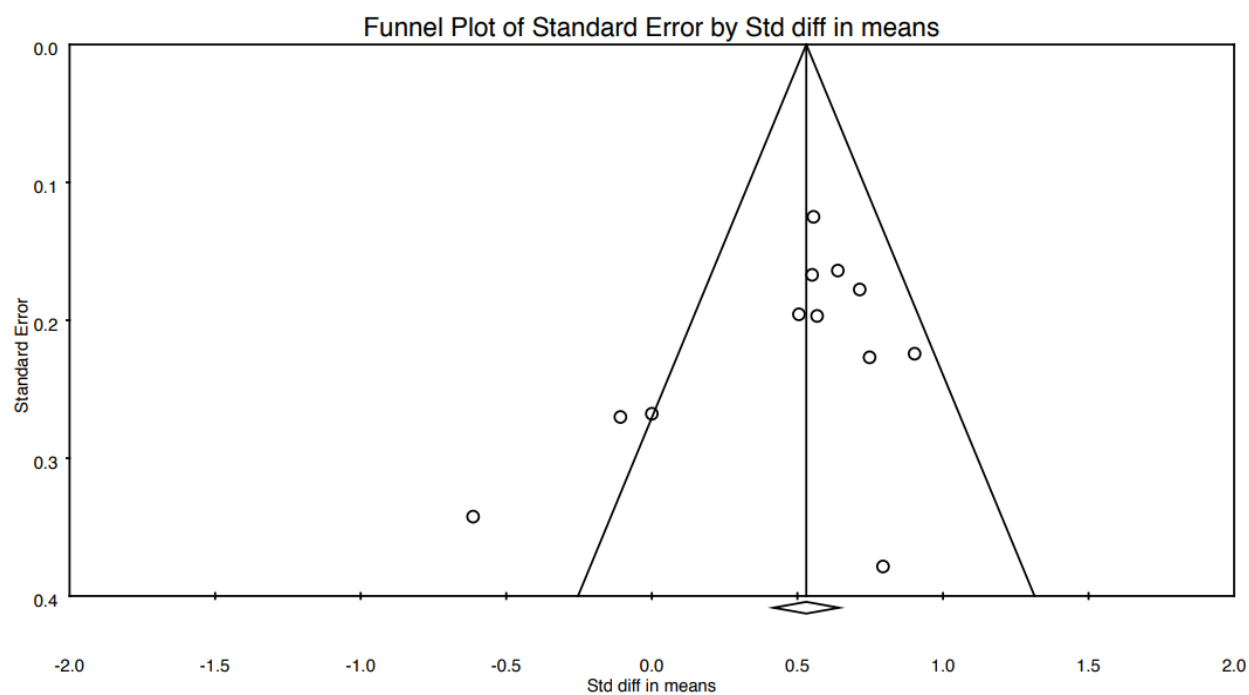

**Supplemental Figure 8:** Funnel plot for publication bias for studies reporting Troponin

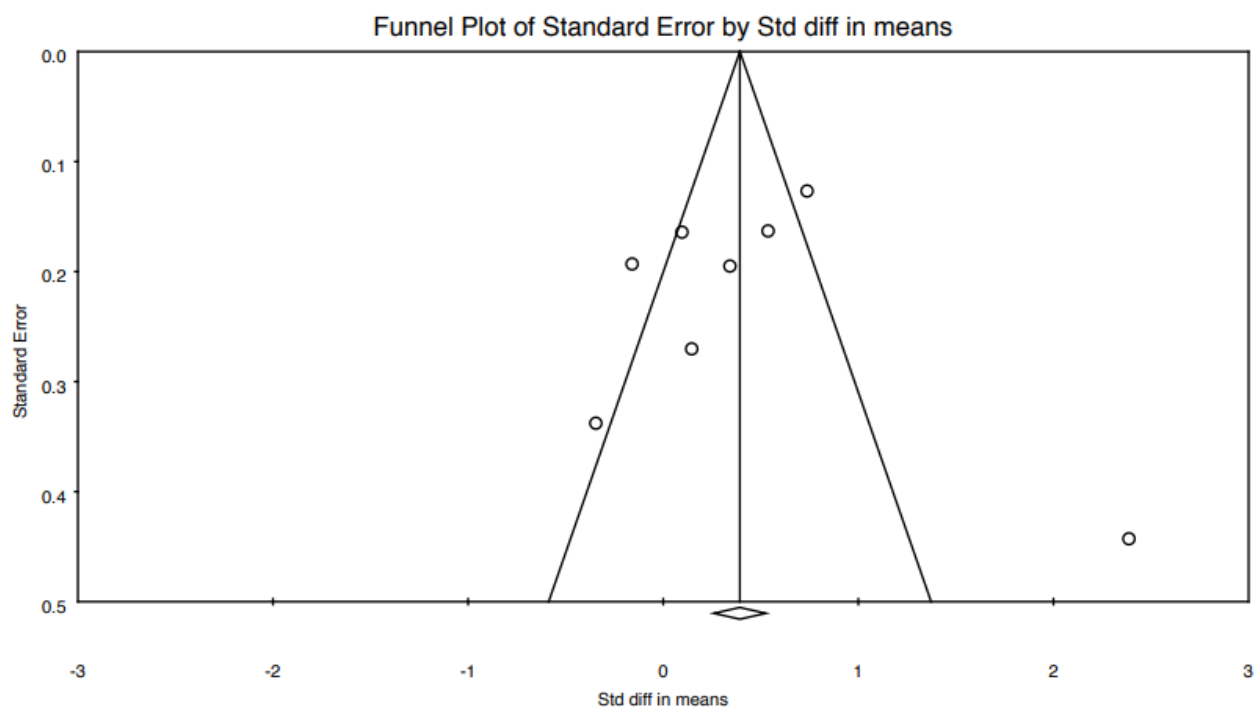

**Supplemental Figure 9:** Funnel plot for publication bias for studies reporting CK

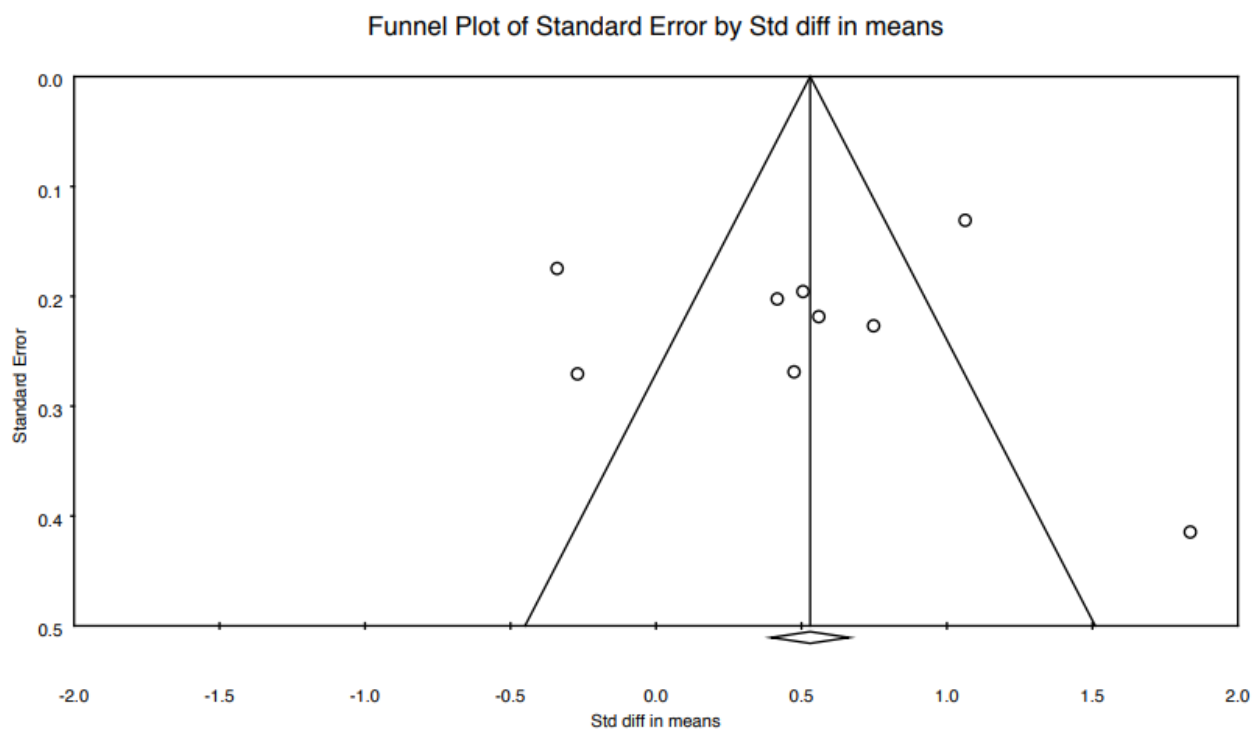

**Supplemental Figure 10:** Funnel plot for publication bias for studies reporting BNP

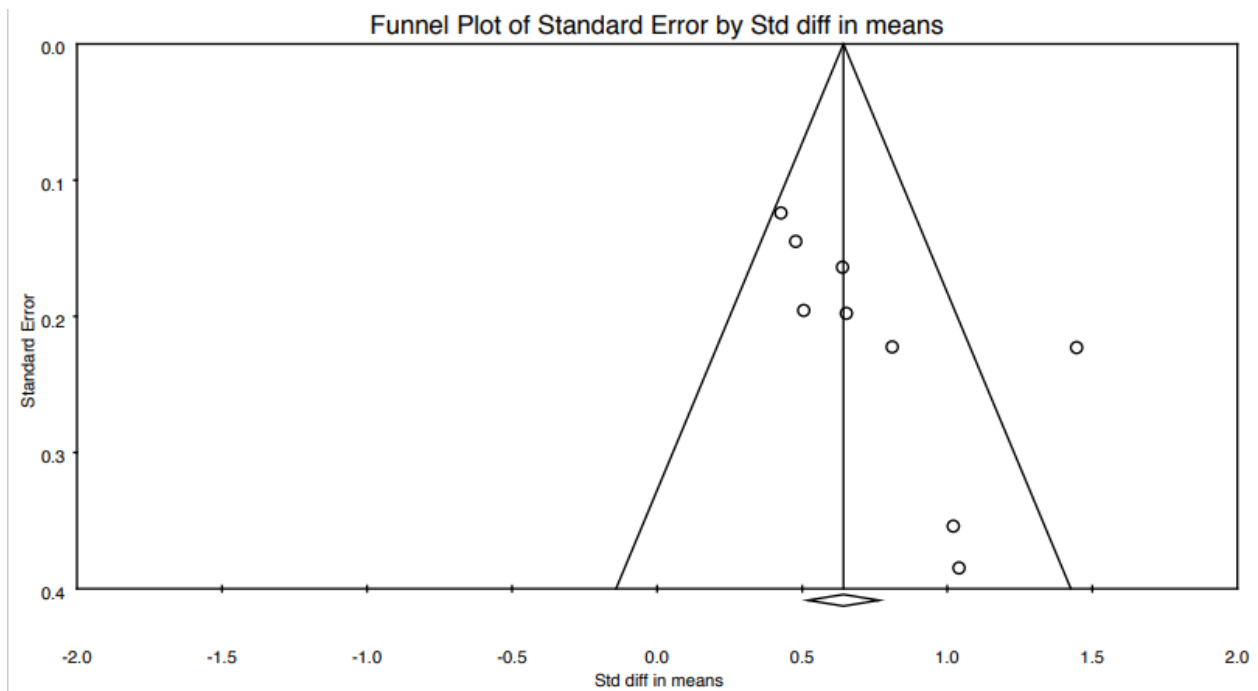

**Supplemental Figure 11:** Funnel plot for publication bias for studies reporting D-dimer

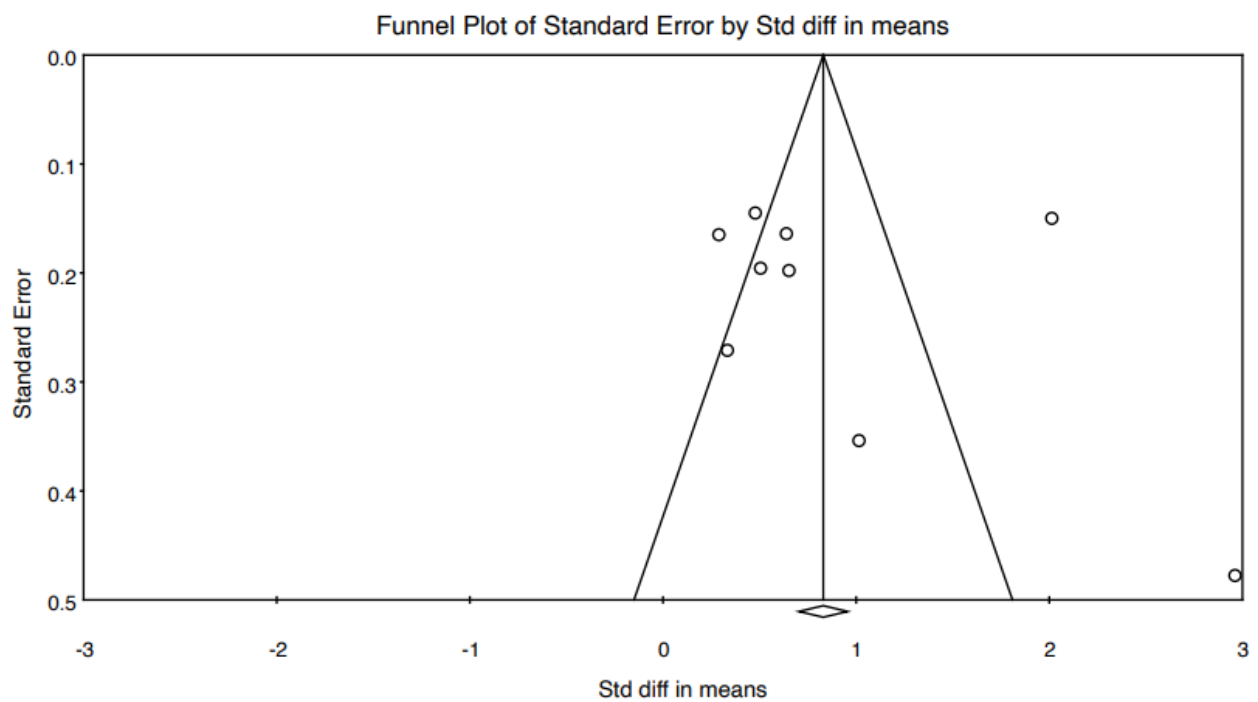

**Supplemental Figure 12:** Funnel plot for publication bias for studies reporting LDH

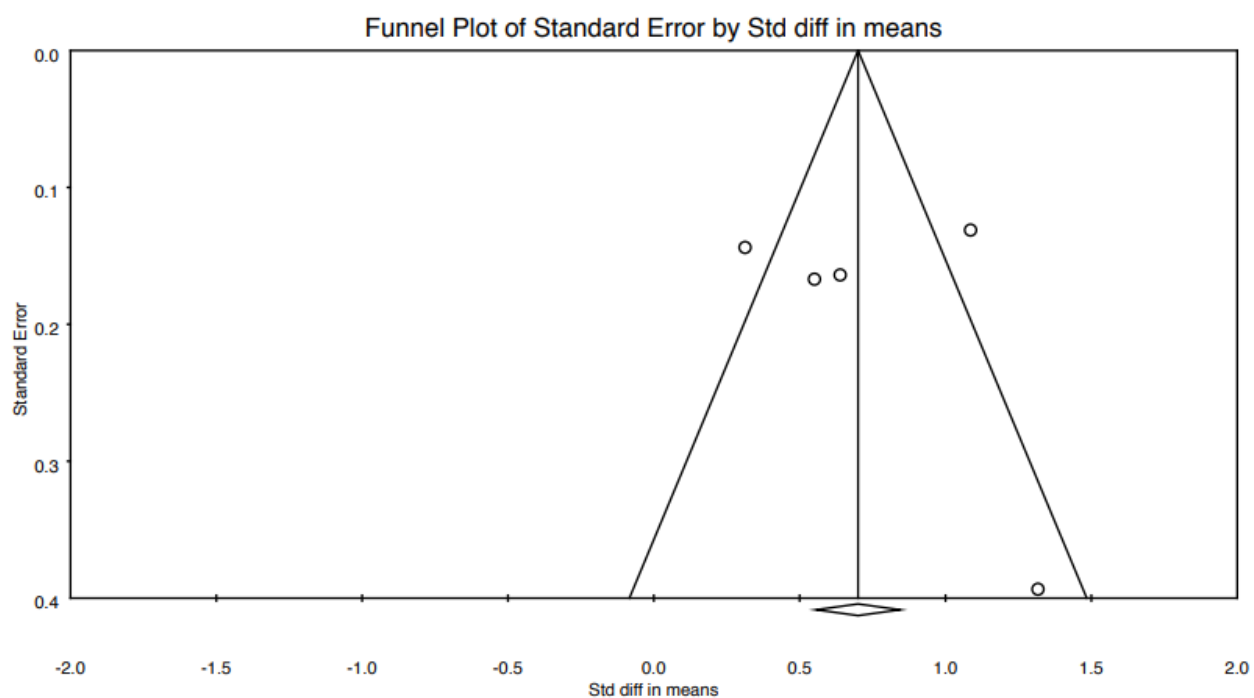

**Supplemental Figure 13:** Funnel plot for publication bias for studies reporting IL-6

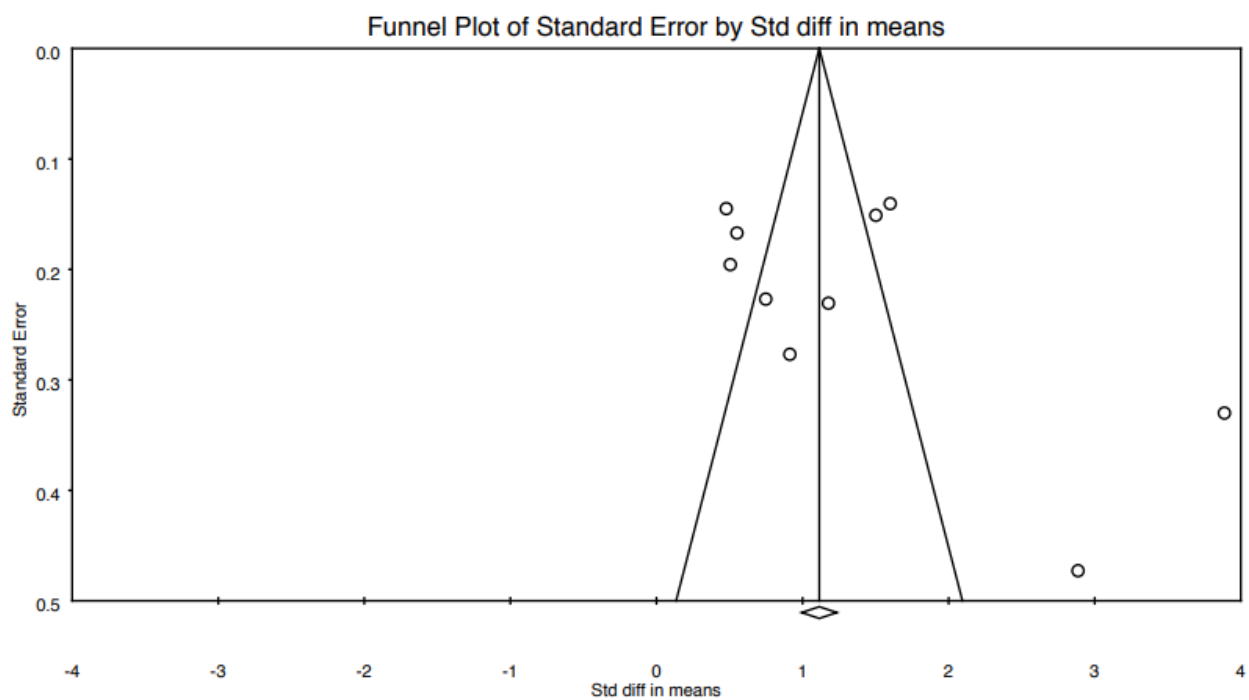

**Supplemental Figure 14:** Funnel plot for publication bias for studies reporting CRP
